# Supplementary material
Source: publisher site journal article supplement (https://static.cambridge.org/content/id/urn:cambridge.org:id:article:S0899823X20002627/resource/name/S0899823X20002627supp001.docx)
Supplement: Supplementary file 1 [file S0899823X20002627supp001.docx]

Supplementary Data

Table S1

|  | | |
| --- | --- | --- |
| Paired Donor Duodenal Culture and Surgical Site Infection | | |
| Positive Donor Duodenal Culture Microorganism | Type of Surgical Site Infection | Causative Microorganism  for Surgical Site Infection |
| *Serratia marcescens* | Superficial | *Serratia marcescens*  *Pseudomonas aeruginosa* |
| Commensal flora | Superficial | Commensal Flora |
| *Enterobacter cloacae* | Superficial | *Enterobacter cloacae* |
| *Lactobacillus species* isolated from fluid medium only | Superficial | Commensal flora |
| *Escherichia coli* | Superficial | Commensal flora |
| *Serratia marcescens* | Superficial | *Candida albicans* |
| *Candida albicans* | Superficial | *Enterococcus species*  *Coagulase negative Staphylococcus*  *Pseudomonas aeruginosa* |
| *Serratia marcescens* | Superficial | Commensal flora |
| *Candida albicans* | Superficial | Commensal flora |
| Commensal flora | Superficial | Commensal flora |
| *Lactobacillus species* | Superficial | Commensal flora |
| *Staphylococcus aureus* | Superficial | *Pseudomonas aeruginosa* |
| Yeast  *Streptococcus viridans* group | Superficial | Commensal flora |
| Candida albicans | Superficial | Commensal flora |
| Commensal flora | Superficial | Yeast |
| *Candida albicans* | Superficial | *Streptococcus anginosus Escherichia coli*  *Lactobacillus species* |
| Commensal flora  *Candida albicans* | Superficial | Commensal flora |
| Yeast,  *Candida albicans* | Superficial | *Escherichia coli*  *Enterobacter cloacae* |
| Yeast | Superficial | Yeast |
| *Candida albicans*  *Coagulase negative Staphylococcus* (broth) | Superficial | Commensal flora  *Pseudomonas aeruginosa* |
| *Lactobacillus species* | Superficial | *Staphylococcus aureus Pseudomonas aeruginosa* |
| *Candida albicans*  *Lactobacillus species* (broth) | Superficial | *Klebsiella pneumoniae Enterobacter cloacae* complex |
| *Candida tropicalis*  Yeast  *Lactobacillus species* (broth) | Superficial | Yeast |
| *Enterobacter cloacae* complex | Superficial | *Enterobacter cloacae* complex |
| *Escherichia coli*  *Lactobacillus species Bacteroides fragilis* | Deep | None identified |
| *Enterobacter aerogenes* | Organ/Space | *Streptococcus viridans* group *Lactobacillus species*  Anaerobic gram negative bacillus |
| *Candida albicans* | Organ/Space | *Candida albicans* |
| Commensal flora | Organ/Space | Commensal flora |
| Commensal flora | Organ/Space | Commensal flora  *Pseudomonas aeruginosa* |
| Commensal flora | Organ/Space | Commensal flora |
| Commensal flora  Yeast | Organ/Space | Enterococcus faecium-vancomycin resistant |
| *E. coli* | Organ/Space | Yeast  *Candida glabrata*  *Candida krusei* |
| *Staphylococcus aureus* | Organ/Space | Gram negative bacillus *Enterococcus species Peptostreptococcus species* |
| *Candida albicans* | Organ/Space | Escherichia coli  Bacteroides thetaiotaomicron  Bacteroides vulgatus  Eggerthella lenta |
| *Streptococcus viridans* group | Organ/Space | *Enterococcus species Corynebacterium species* |
| *Enterococcus species* (broth)  *Acinetobacter lwoffii* (broth) | Organ/Space | *Streptococcus anginosus* group |
| *Group B Streptococcus* (Broth) | Organ/Space | *Candida albicans*  *Coagulase negative Staphylococcus*  *Enterococcus faecium* (broth) |
| *Candida albicans* | Organ/Space | Commensal flora including *Coagulase-negative Staphylococcus*  alpha hemolytic streptococci |
| *Kluyveromyces marxianus Lactobacillus species* | Organ/Space | *Streptococcus anginosis* group Commensal flora |
| *Candida albicans* | Organ/Space | Commensal flora |
| *Bifidobacterium species* | Organ/Space | *Pseudomonas aeruginosa* |
| *Candida albicans* | Organ/Space | *Enterobacter cloacae complex*  *Kluyvera cryocrescens* |

**Commensal flora = mixture of both gram positive and gram negative aerobic microorganisms with no predominant isolate and not speciated further.**
